# Supplementary material for: An inner-electropolymerization method for preparing electrochromic devices with various shapes and a large size
Source: Royal Society of Chemistry journal article supplement (doi:10.1039/c9tc01186b), 2019-01-01
Supplement: c9tc01186b1.pdf [file c9tc01186b1.pdf]

## Inner-electropolymerization Method for Preparing Electrochromic Devices with Various Shapes and Large Size

Shian Guan, Wenjing Wang, Baozhang Li, Jianming Zheng and Chunye Xu\*

Hefei National Laboratory for Physical Sciences at the Microscale, CAS Key Lab of Soft Matter Chemistry, Department of Polymer Science and Engineering, University of Science and Technology of China, Hefei, 230026, P. R. China.

\*E-mail: chunye@ustc.edu.cn

### Supporting Figures

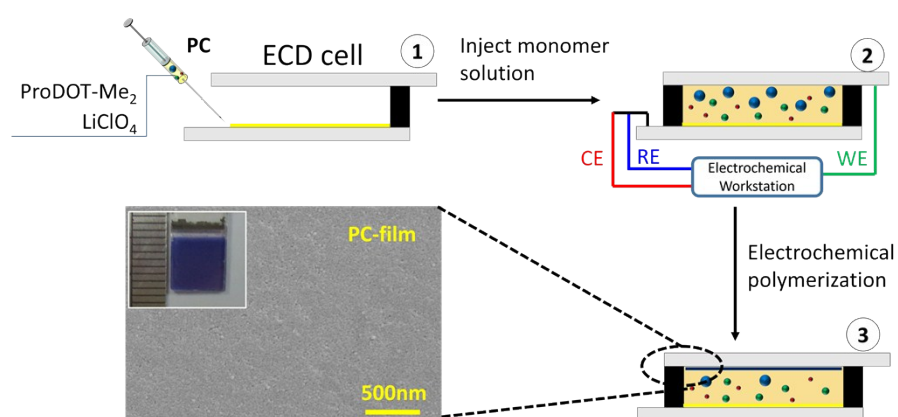

**Figures S1.** Schematic diagrams of ECD fabrication process. (1): Inject the monomer solution, prepared by dissolving 0.01 M monomer (ProDOT-Me<sub>2</sub>) and 0.1 M LiClO<sub>4</sub> in Propylene carbonate (PC) solvent; (2): Electrochemical polymerizing inside the ECD cell, 3.5 V is applied and lasting for 3.5 s; (3): The PProDot-Me<sub>2</sub> film (PC-film) is synthesized, and its corresponding SEM.

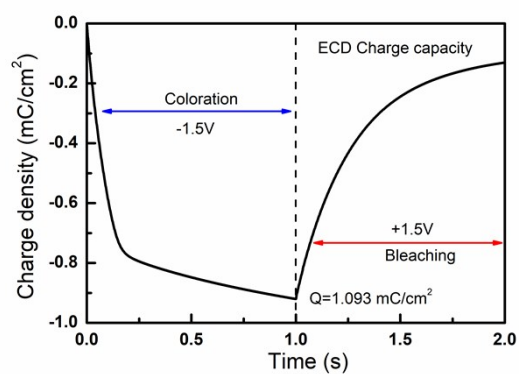

**Figures S2.** Chronocoulometry curves of the obtained ECD prepared via inner-electropolymerization method.

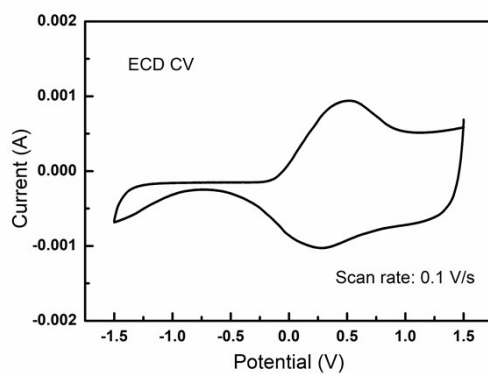

**Figures S3.** Cyclic voltammograms of the obtained ECD tested under a scan rate of 0.1 V/s.

**Table S1.** The summary of the obtained ECD's electrochromic properties at different wavelengths.

| ECD              | $\Delta T$ | Response time (s) | $\Delta OD$ | $Q_d$ (mC/cm <sup>2</sup> ) | CE (cm <sup>2</sup> /C) |
|------------------|------------|-------------------|-------------|-----------------------------|-------------------------|
| $\lambda=580$ nm | 61%        | ~0.5              | 0.589       | 1.093                       | 539                     |
| $\lambda=555$ nm | 41.4%      | -                 | 0.430       | 1.093                       | 393                     |
| $\lambda=633$ nm | 40.8%      | -                 | 0.431       | 1.093                       | 394                     |
